# Supplementary material
Source: publisher site journal article supplement (https://www.dovepress.com/article/553720)
Supplement: Supplementary file 1 [file Supplementary%20Material.docx]

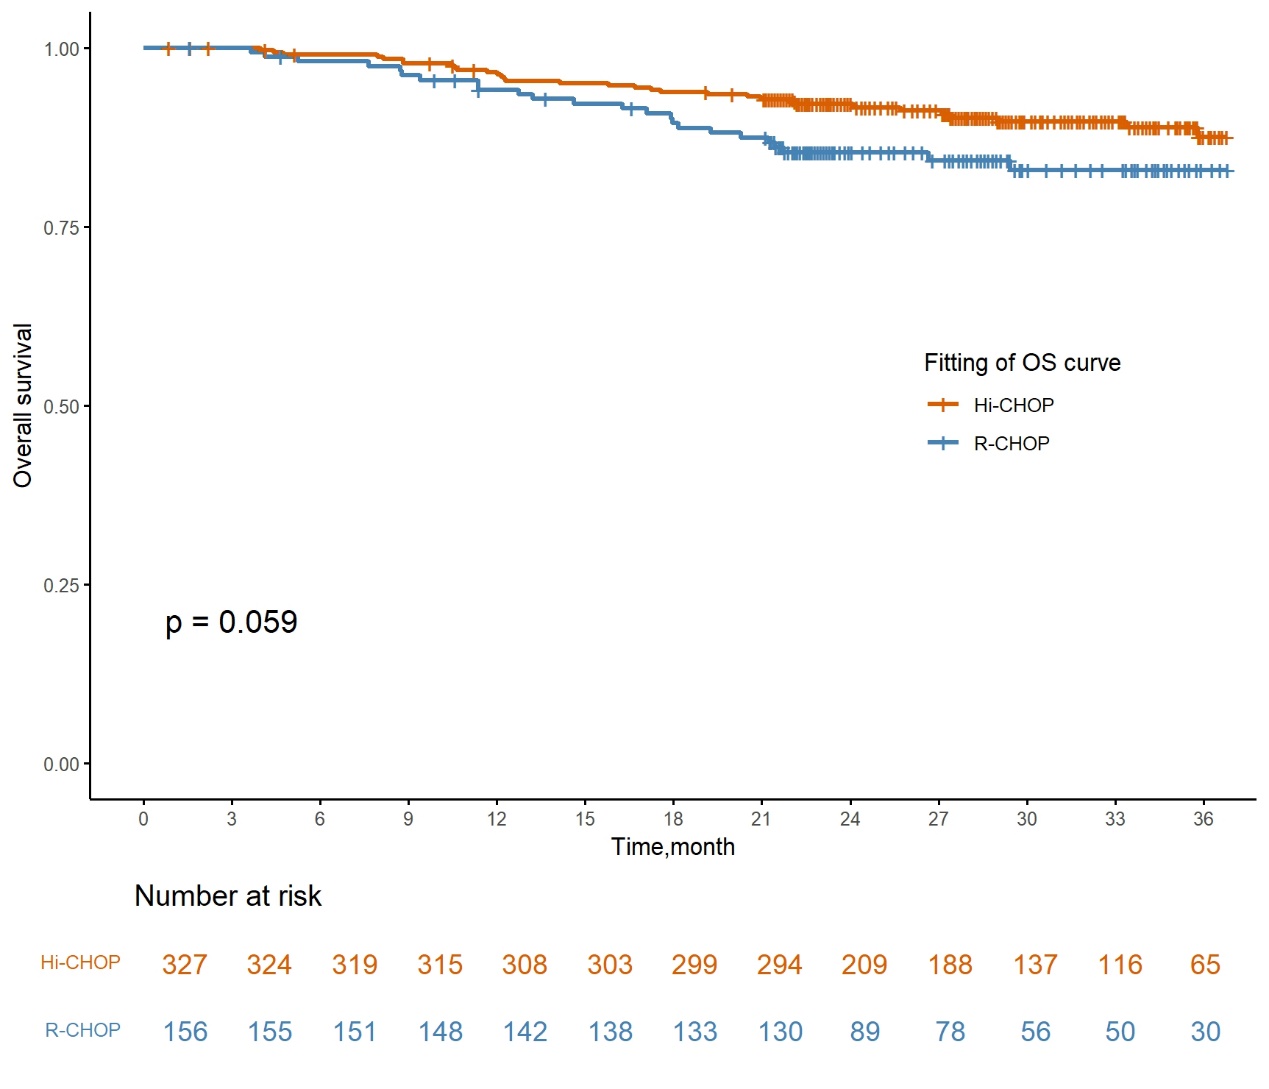


**Figure S1** Overall Survival Curve Data Extraction.


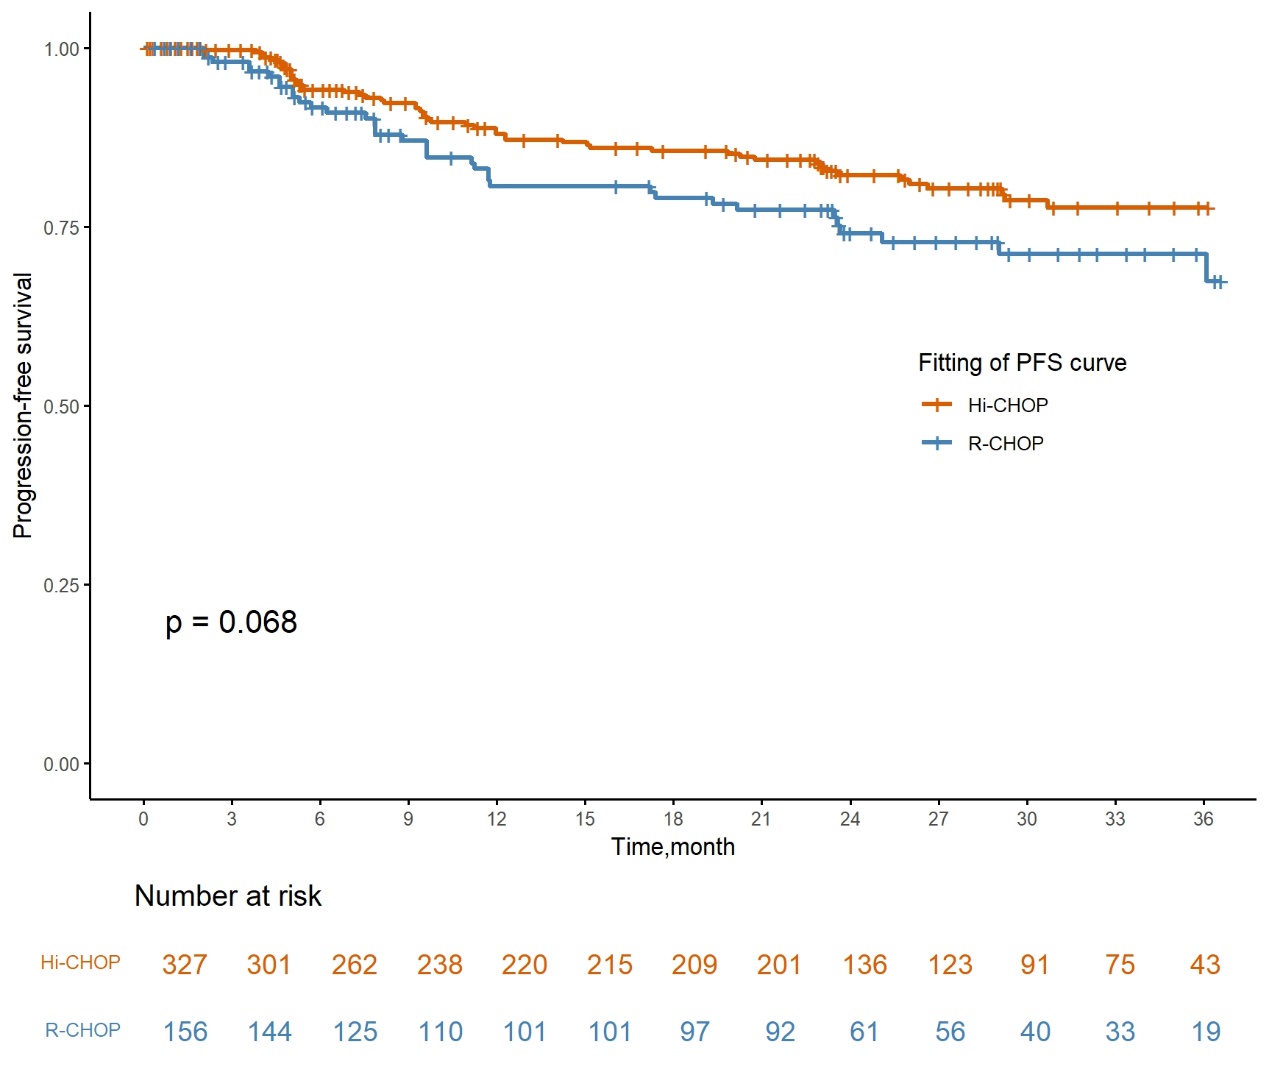


**Figure S2**Progression-free Survival Curve Data Extraction.

**Table S1** Summary of Statistical Goodness-of-fit of Partitioned Survival Model

|  | Exponential | Gamma | Weibull(PH) | Loglogistic | Lognormal |
| --- | --- | --- | --- | --- | --- |
| OS Curve of Hi-CHOP |  |  |  |  |  |
| AIC | 427.458 | 426.1848 | 426.4805 | 426.161 | 424.0895 |
| BIC | 431.2479 | 433.7647 | 434.0605 | 433.7409 | 431.1694 |
| OS Curve of R-CHOP |  |  |  |  |  |
| AIC | 296.9697 | 297.2109 | 297.5309 | 296.9267 | 294.9697 |
| BIC | 300.0196 | 303.3106 | 303.6306 | 303.0264 | 301.0694 |
| PFS Curve of Hi-CHOP |  |  |  |  |  |
| AIC | 612.791 | 614.5255 | 614.6904 | 613.1339 | 607.5426 |
| BIC | 616.5814 | 622.1054 | 622.2703 | 620.7138 | 615.1225 |
| PFS Curve of R-CHOP |  |  |  |  |  |
| AIC | 396.3753 | 398.3752 | 398.3414 | 396.9136 | 393.36 |
| BIC | 399.4251 | 404.4749 | 404.4411 | 403.0133 | 399.4597 |

**Abbreviations:** OS, overall survival; PFS, progression-free survival; AIC, Akaike information criterion; BIC, Bayesian information criterion; Hi-CHOP, zuberitamab combined with CHOP; R-CHOP, rituximab combined with CHOP.

**Table S2** OS and PFS Model parameters

|  | Distributions | Scale | Shape |
| --- | --- | --- | --- |
| OS Curve of Hi-CHOP | Lognormal | 1.514 | 5.321 |
| OS Curve of R-CHOP | Exponential | 0.00583 | / |
| PFS Curve of Hi-CHOP | Lognormal | 1.701 | 4.772 |
| PFS Curve of R-CHOP | Exponential | 0.01136 | / |

**Abbreviations:** OS, overall survival; PFS, progression-free survival; Hi-CHOP, zuberitamab combined with CHOP; R-CHOP, rituximab combined with CHOP.

**Table S3a** Summary of scenario analysis results (25% off)

| Parameter | Treatment | |
| --- | --- | --- |
| Hi-CHOP | R-CHOP |
| Total cost, $ | 682,701.95 | 486,204.93 |
| Incremental total cost | 196,497.02 | |
| QALYs | 6.45 | 4.88 |
| QALY gain | 1.57 | |
| ICER, $ (Hi-CHOP vs R-CHOP, Per QALY) | 124,889.93 | |

**Table S3b** Summary of scenario analysis results (50% off)

| Parameter | Treatment | |
| --- | --- | --- |
| Hi-CHOP | R-CHOP |
| Total cost, $ | 641,032.73 | 486,204.93 |
| Incremental total cost | 154,827.81 | |
| QALYs | 6.45 | 4.88 |
| QALY gain | 1.57 | |
| ICER, $ (Hi-CHOP vs R-CHOP, Per QALY) | 98,405.73 | |

**Table S3c** Summary of scenario analysis results (75% off)

| Parameter | Treatment | |
| --- | --- | --- |
| Hi-CHOP | R-CHOP |
| Total cost, $ | 599,364.82 | 486,204.93 |
| Incremental total cost | 113,159.89 | |
| QALYs | 6.45 | 4.88 |
| QALY gain | 1.57 | |
| ICER, $ (Hi-CHOP vs R-CHOP, Per QALY) | 71,922.37 | |

**Abbreviations:** QALY, quality-adjusted life year; ICER, incremental cost-effectiveness ratio; Hi-CHOP, zuberitamab combined with CHOP; R-CHOP, rituximab combined with CHOP.
